# Supplementary material
Source: PubMed Central journal article supplement (PMC3604725)

Figure 1B

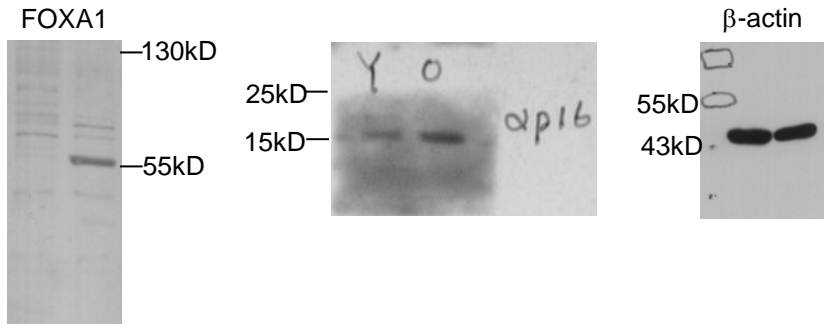

Figure 1C

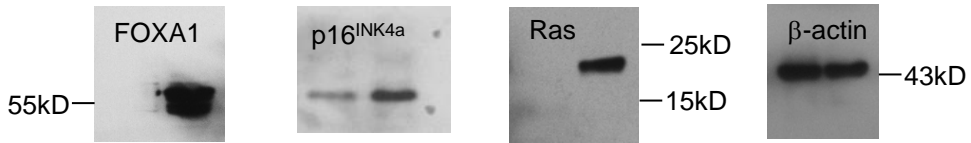

Figure 1D

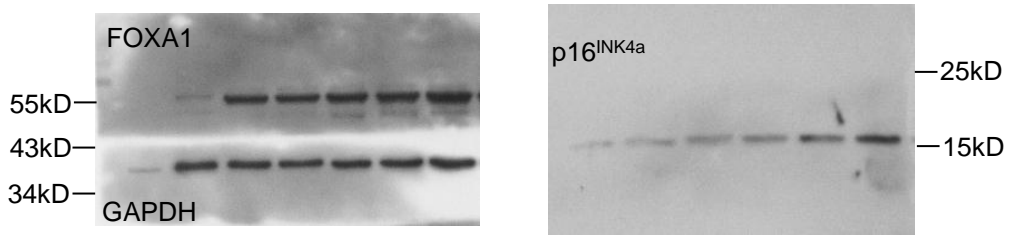

Figure 1E

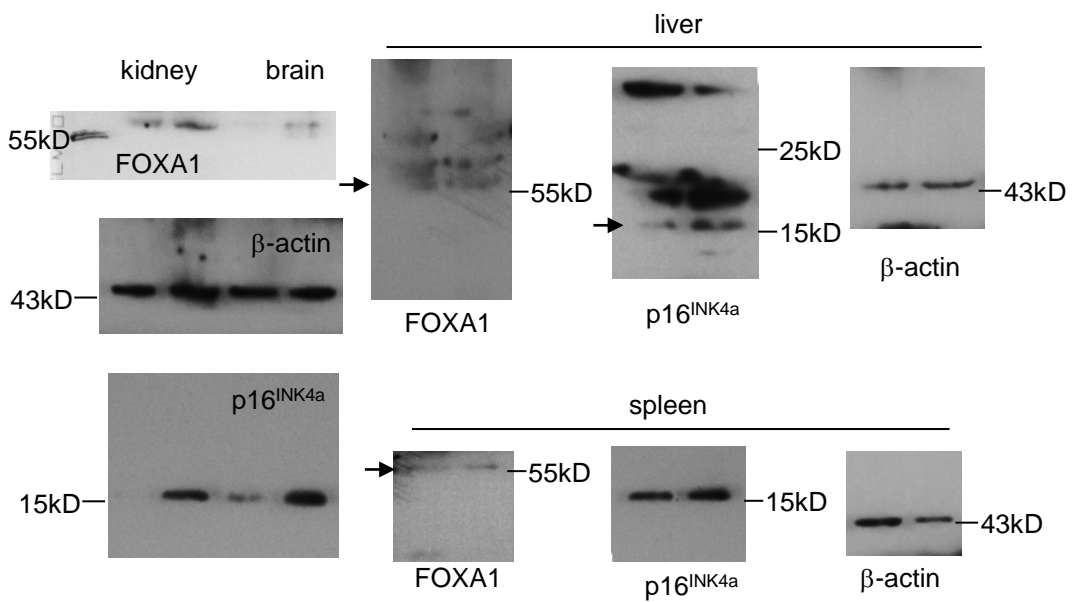

Supplement: emboj201335df1.pdf [file emboj201335df1.pdf]

Figure 2A

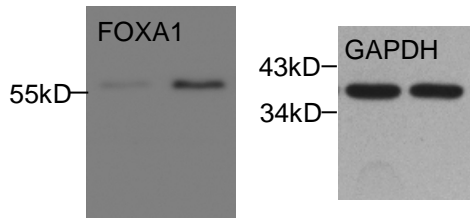

Figure 2B

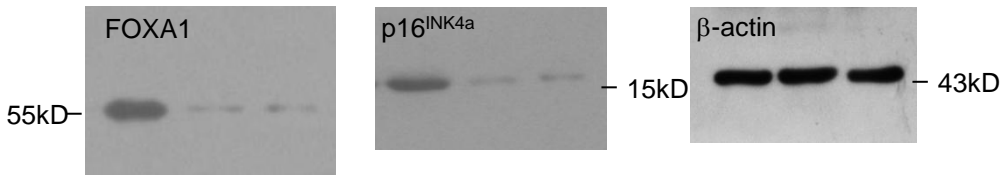

Figure 2C

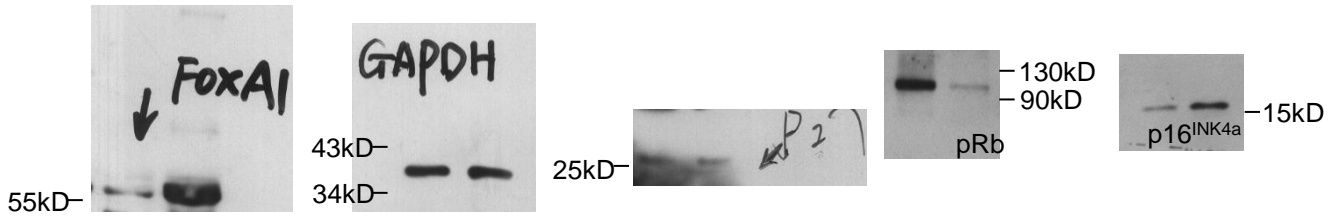

Figure 2D

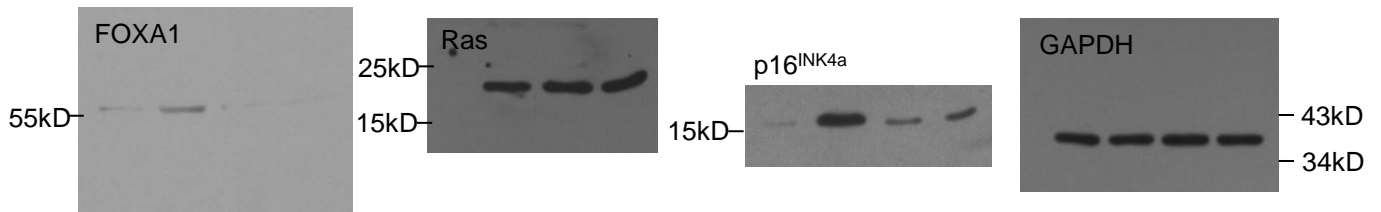

Figure 2E

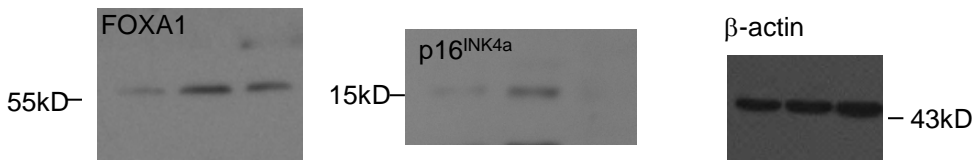

Supplement: emboj201335df2.pdf [file emboj201335df2.pdf]

Figure 3B

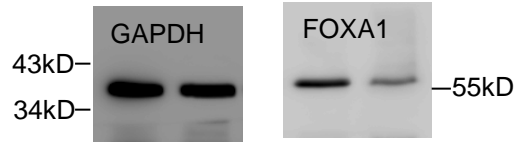

Figure 3C

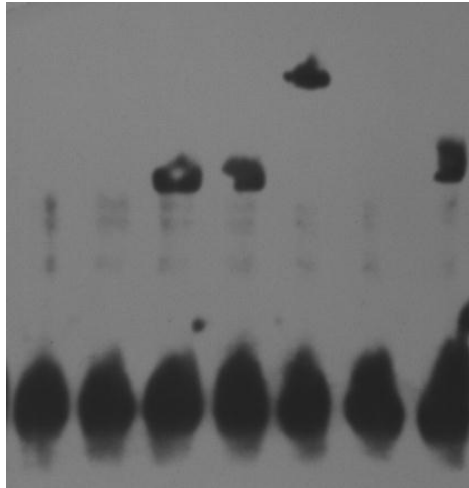

Supplement: emboj201335df3.pdf [file emboj201335df3.pdf]

Figure 5A

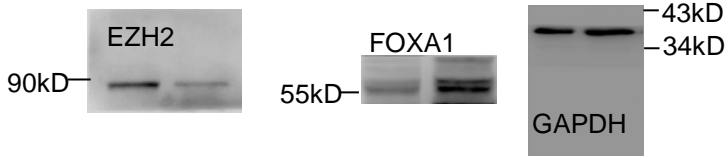

Figure 5B

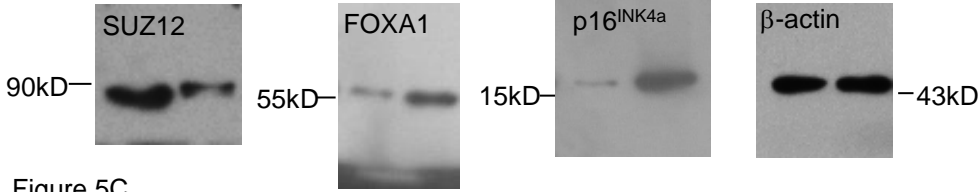

Figure 5C

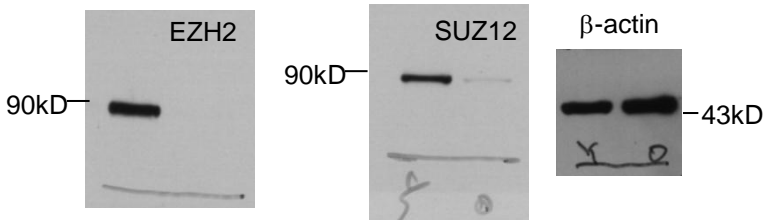

Figure 5D

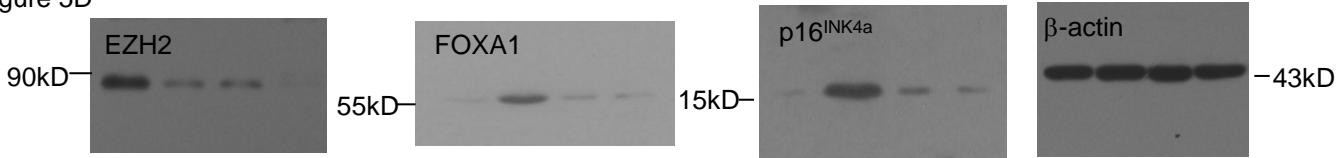

Figure 5E

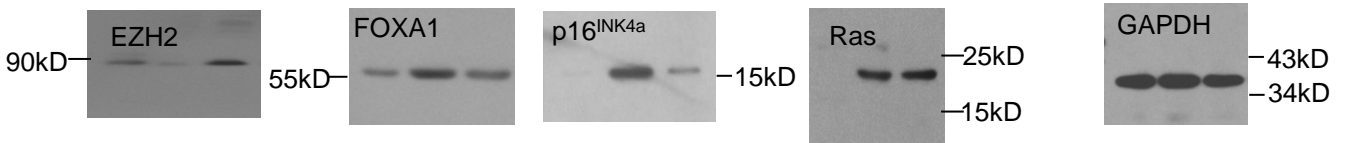

Figure 5G

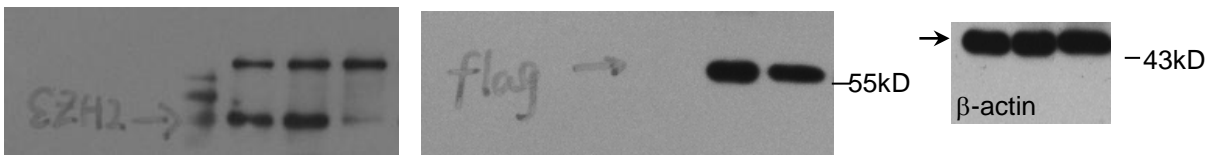

Supplement: emboj201335df5.pdf [file emboj201335df5.pdf]

Figure 6B

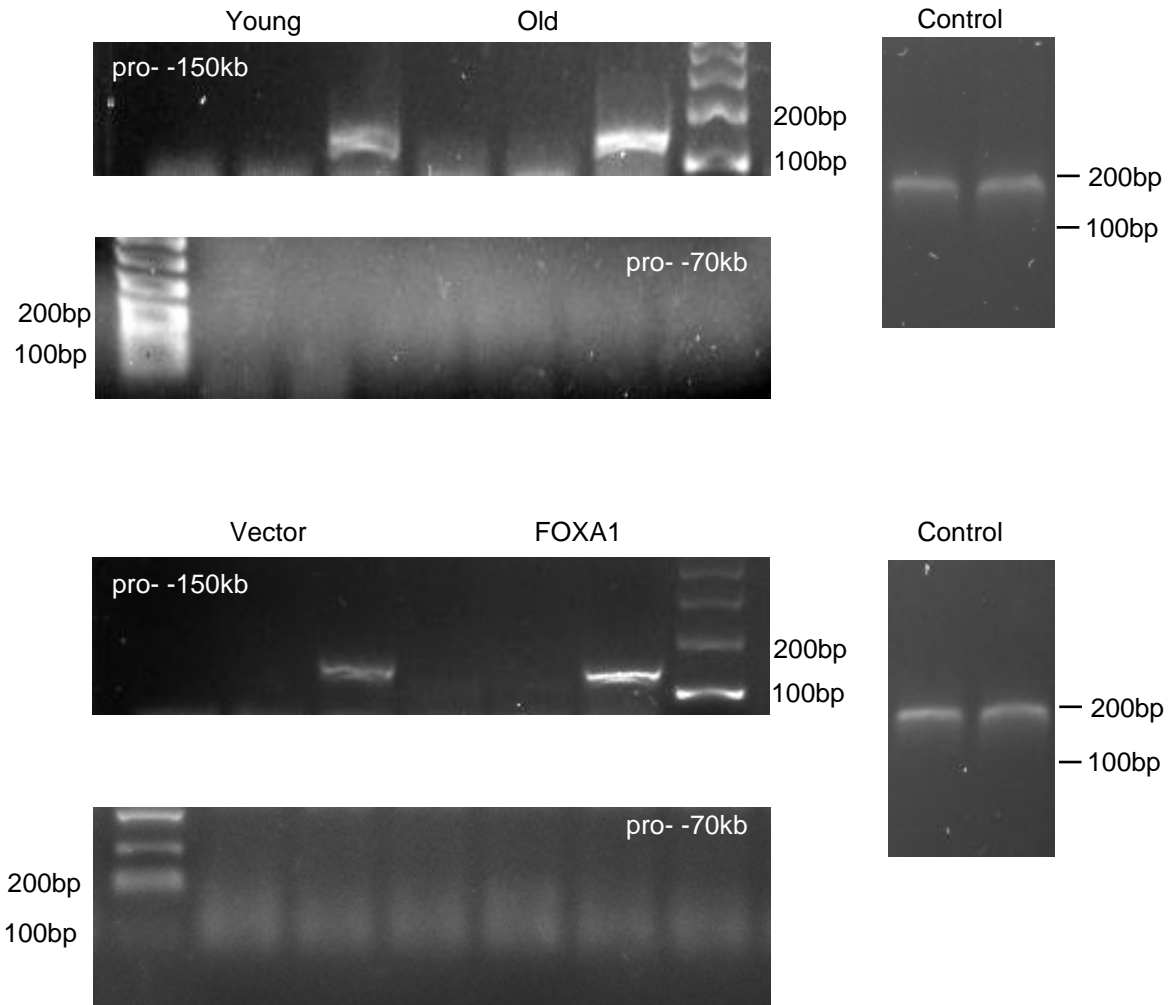

Supplement: emboj201335df6.pdf [file emboj201335df6.pdf]

Figure 7A

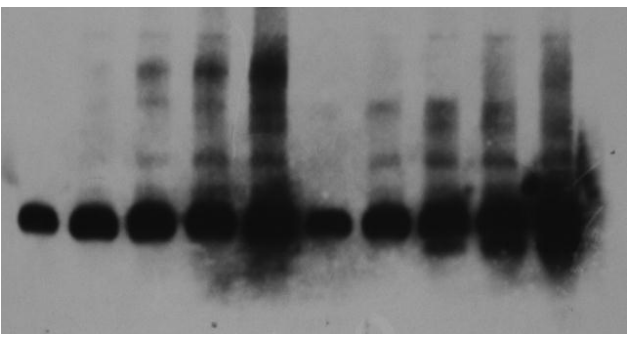

Figure 7D

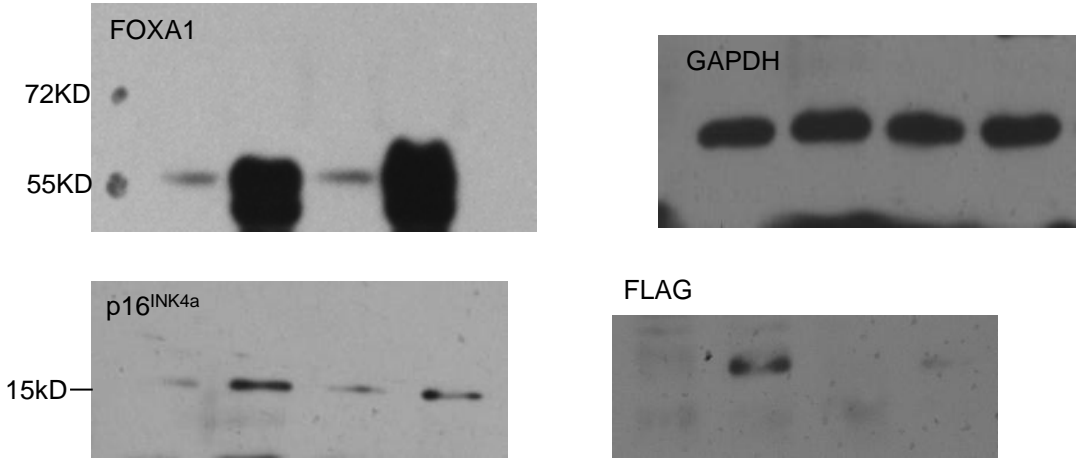

Supplement: emboj201335df7.pdf [file emboj201335df7.pdf]
